# Supplementary material for: Citrus Varieties with Different Tolerance Grades to Tristeza Virus Show Dissimilar Volatile Terpene Profiles
Source: MDPI journal article supplement (doi:10.3390/agronomy11061120), 2021-05-30
Supplement: s1 [file s1]

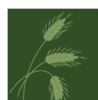

## Supplementary material

**Table S1.** Relative contents of terpenes (means  $\pm$  standard error) of *Citrus volkameriana* (CV), Carrizo citrange (CC), Forner-Alcaide no. 5 (FO) and *Citrus aurantium* (CA). Statistical results of the Kruskal–Wallis ANOVA Test examining the variations of the relative terpene contents between the four *Citrus* varieties (d.f. = 3); p-value where \*  $p < 0.05$ , and \*\*  $p < 0.01$ . NS: not significant. N° samples: 4 for each variety.

| Compound               | <i>Citrus varieties</i> |            |       |      |       |      |       |      | $\chi^2(p)$ |
|------------------------|-------------------------|------------|-------|------|-------|------|-------|------|-------------|
|                        | CV                      |            | CC    |      | FO    |      | CA    |      |             |
| $\alpha$ -pinene       | 0.62                    | $\pm 0.05$ | 0.57  | 0.11 | 0.55  | 0.10 | 0.13  | 0.00 | 8.74 *      |
| camphene               | 0.02                    | $\pm 0.00$ | 0.05  | 0.01 | 0.05  | 0.01 | 0.07  | 0.01 | 6.73 NS     |
| $\beta$ -pinene        | 0.49                    | $\pm 0.02$ | 0.02  | 0.01 | 0.02  | 0.00 | 0.62  | 0.03 | 12.50 **    |
| sabinene               | 15.01                   | $\pm 0.81$ | 0.12  | 0.01 | 0.13  | 0.02 | 0.17  | 0.01 | 11.54 **    |
| $\delta$ -3-carene     | 0.01                    | $\pm 0.00$ | 5.48  | 0.67 | 6.21  | 0.40 | 0.66  | 0.04 | 12.73 **    |
| myrcene                | 1.24                    | $\pm 0.19$ | 5.32  | 0.75 | 6.44  | 1.58 | 1.04  | 0.02 | 11.40 **    |
| $\alpha$ -phellandrene | 0.04                    | $\pm 0.00$ | 0.69  | 0.08 | 0.94  | 0.12 | 0.06  | 0.00 | 13.50 **    |
| $\alpha$ -terpinene    | 0.06                    | $\pm 0.00$ | 0.19  | 0.02 | 0.19  | 0.02 | 0.04  | 0.00 | 12.71 **    |
| limonene               | 36.09                   | $\pm 3.78$ | 57.02 | 4.45 | 46.93 | 2.53 | 0.31  | 0.04 | 12.80 **    |
| $\gamma$ -terpinene    | 0                       |            | 0.17  | 0.01 | 1.18  | 0.98 | 0.01  | 0.00 | 13.25 **    |
| ocimene                | 2.17                    | 0.21       | 4.81  | 1.08 | 6.46  | 0.79 | 1.17  | 0.08 | 11.93 **    |
| p-cymene               | 0.03                    | 0.00       | 0.03  | 0.00 | 0.05  | 0.01 | 0.02  | 0.00 | 9.82 *      |
| terpinolene            | 0.09                    | 0.01       | 2.83  | 0.80 | 1.96  | 0.22 | 0.16  | 0.01 | 12.80 **    |
| nonanal                | 0.35                    | 0.04       | 0     |      | 0     |      | 0     |      |             |
| linalool               | 14.40                   | 3.11       | 1.52  | 0.39 | 2.45  | 0.63 | 63.73 | 1.36 | 13.59 **    |
| linalyl acetate        | 0                       |            | 0     |      | 0     |      | 28.35 | 1.15 |             |
| $\alpha$ -terpineol    | 0.45                    | 0.11       | 0.29  | 0.17 | 0.30  | 0.14 | 0.09  | 0.01 | 3.40 NS     |
| geranyl acetate        | 0.32                    | 0.31       | 0.62  | 0.61 | 1.00  | 1.00 | 1.04  | 0.13 | 3.08 NS     |
| $\beta$ -citronellol   | 1.45                    | 0.49       | 0.52  | 0.52 | 1.85  | 0.75 | 0     |      | 5.90 NS     |
| nerol                  | 0.33                    | 0.06       | 0.08  | 0.02 | 0.10  | 0.02 | 0.40  | 0.04 | 11.93 **    |
| geraniol               | 0.15                    | 0.07       | 3.32  | 0.96 | 6.69  | 1.70 | 0.71  | 0.08 | 13.50 **    |
| citronellal            | 25.49                   | 2.90       | 3.71  | 1.29 | 7.76  | 1.32 | 0.17  | 0.03 | 13.5 **     |
| $\beta$ -caryophyllene | 0.45                    | 0.23       | 4.58  | 1.44 | 2.93  | 1.04 | 0.55  | 0.09 | 11.60 **    |
| $\alpha$ -humulene     | 0.13                    | 0.13       | 0.90  | 0.12 | 0.54  | 0.24 | 0.13  | 0.08 | 9.16 *      |
| $\delta$ -elemene      | 0.08                    | 0.02       | 0.14  | 0.03 | 0.08  | 0.02 | 0.02  | 0.00 | 10.48 *     |
| elixene                | 0                       |            | 0.09  | 0.05 | 0.10  | 0.06 | 0.11  | 0.02 | 4.43 NS     |
| $\beta$ -ylangene      | 0.01                    | 0.00       | 0.21  | 0.09 | 0.12  | 0.05 | 0     |      | 13.11 **    |
| $\gamma$ -elemene      | 0.25                    | 0.04       | 2.21  | 0.41 | 1.61  | 0.40 | 0     |      | 13.10 **    |
| $\beta$ -farnesene     | 0                       |            | 1.69  | 0.62 | 1.27  | 0.45 | 0.03  | 0.01 | 12.92 **    |
| germacrene             | 0.01                    | 0.01       | 2.54  | 0.66 | 1.62  | 0.40 | 0.01  | 0.00 | 13.11 **    |
| sesquiterpene          | 0.26                    | 0.04       | 0.28  | 0.04 | 0.49  | 0.14 | 0.23  | 0.05 | 3.07 NS     |

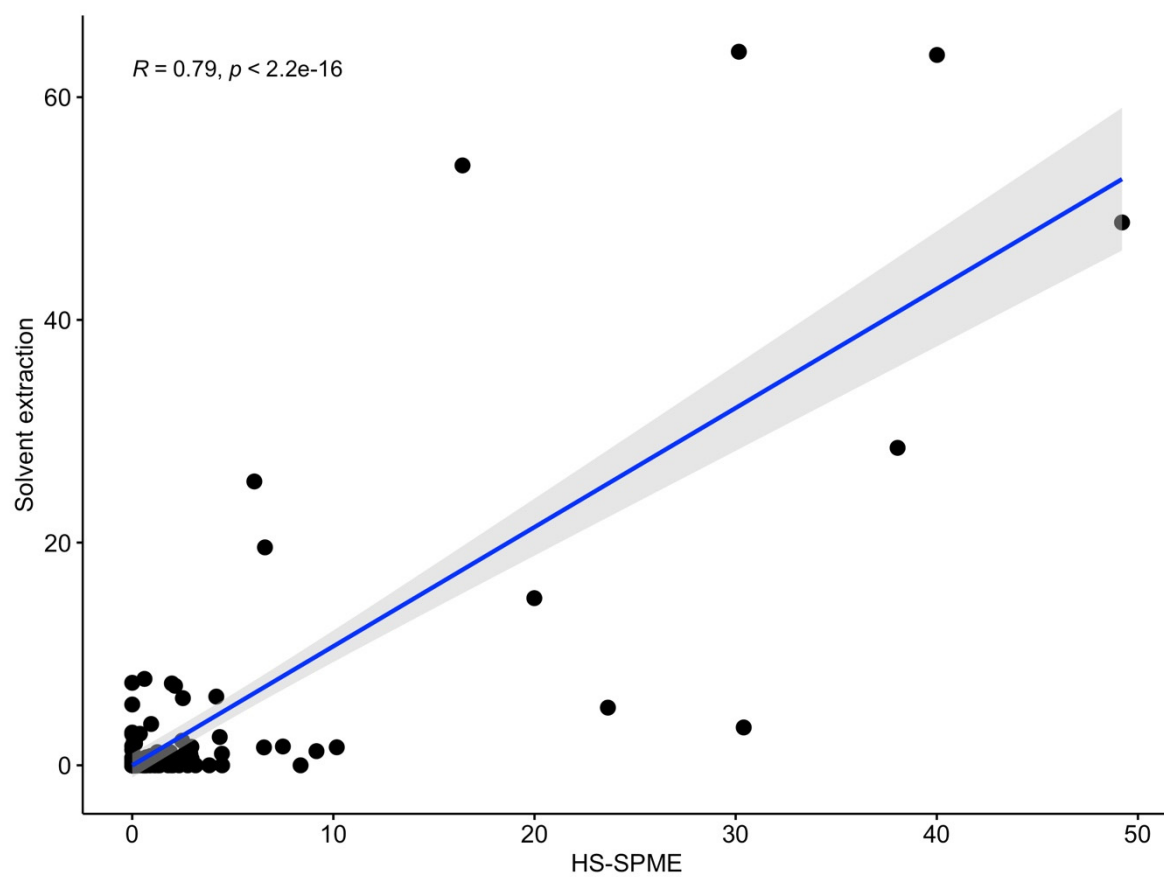

**Figure S1.** Correlation analysis between HS-SPME and solvent extraction results for each variety investigated. The Pearson Correlation Coefficient ( $R = 0.79$ ) and the p-value ( $p < 2.2e-16$ ) were reported.
